# Supplementary material for: Butyrate and Class I Histone Deacetylase Inhibitors Promote Differentiation of Neonatal Porcine Islet Cells into Beta Cells
Source: MDPI journal article supplement (doi:10.3390/cells10113249), 2021-11-19
Supplement: s1 [file s1]

# Supplements

## Supplemental Figure 1

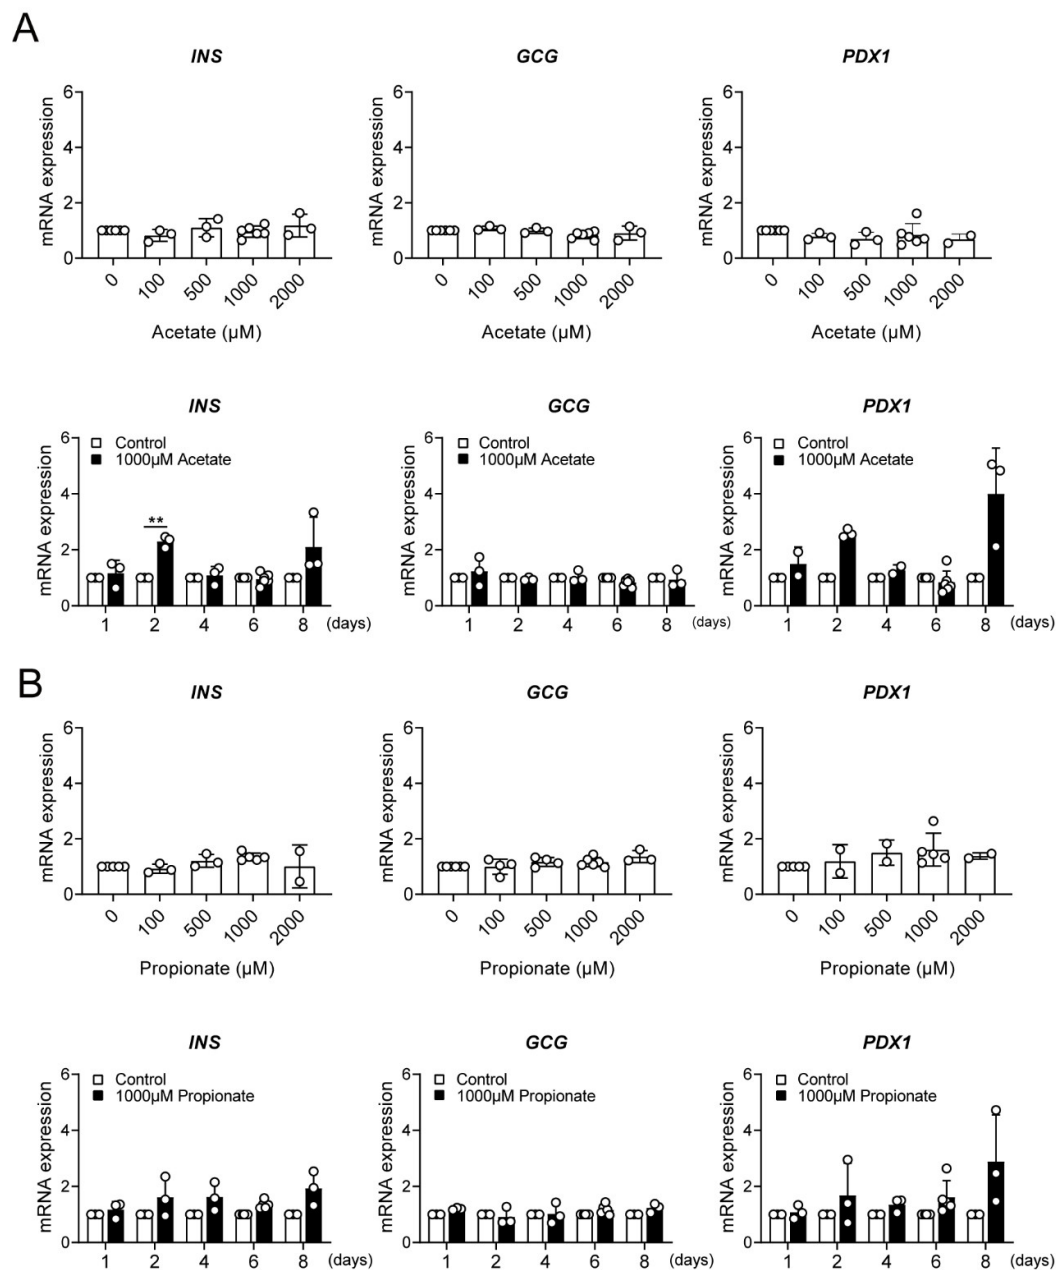

**Supplemental Figure S1.** Relative gene expression of insulin (*INS*), glucagon (*GCG*) and *PDX1* detected by RT-qPCR in NPICCs after incubation with acetate (10–2000  $\mu\text{M}$ ) or propionate (10–2000  $\mu\text{M}$ ) for six days and 1000  $\mu\text{M}$  acetate or 1000  $\mu\text{M}$  propionate for one to eight days. (**A and B**) Time course and dose-dependence of acetate and propionate treatment. Cells without butyrate exposure were used as controls. Data from three to six independent experiments are presented as mean  $\pm$  SD.  $**p < 0.01$  vs. control groups. .

## Supplemental Figure 2

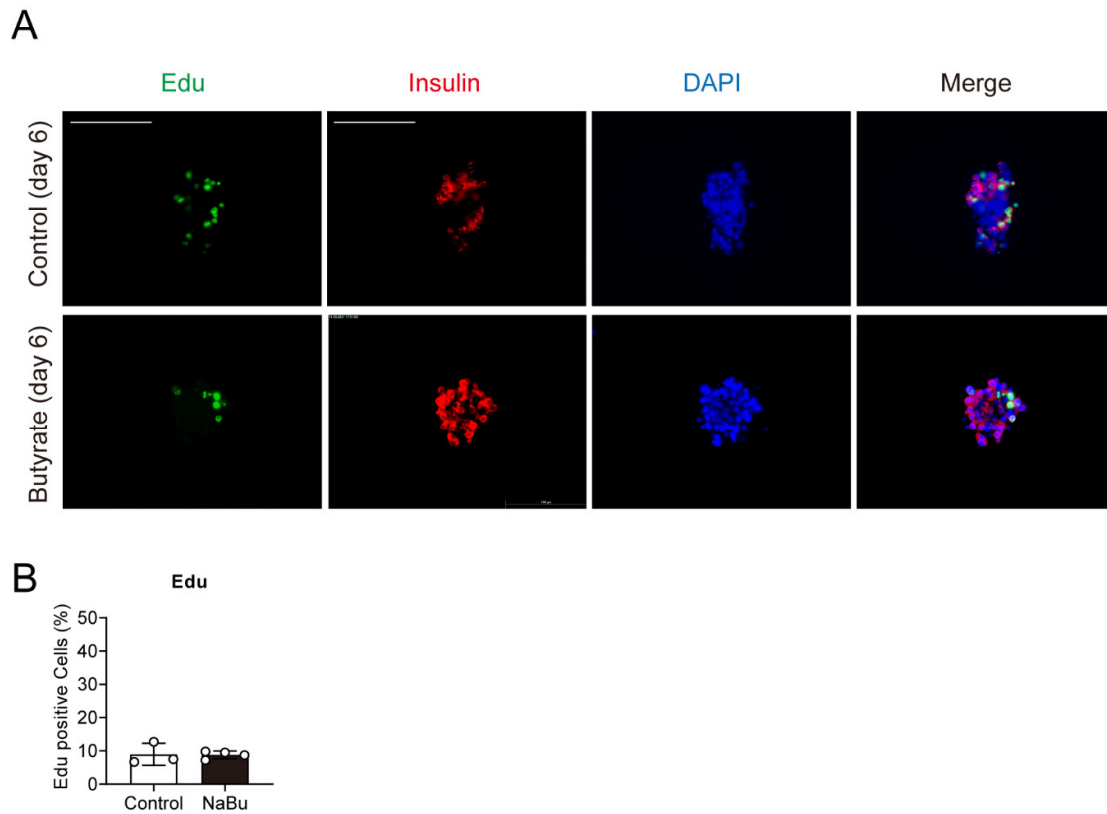

**Supplemental Figure S2.** The percentage of proliferating cells is not affected by butyrate treatment. NICCs were cultured in the presence of Edu (10  $\mu$ M). Proliferation was measured by Edu staining (green) and co-staining for insulin (red) and nuclei (blue). **(A)** Representative images are shown. **(B)** Percentage of Edu-positive cells in relation to the total cell count. Scale bars = 100  $\mu$ m.
